# Supplementary material
Source: HighWire-hosted journal article supplement (https://jitc.bmj.com/content/1/1/7)

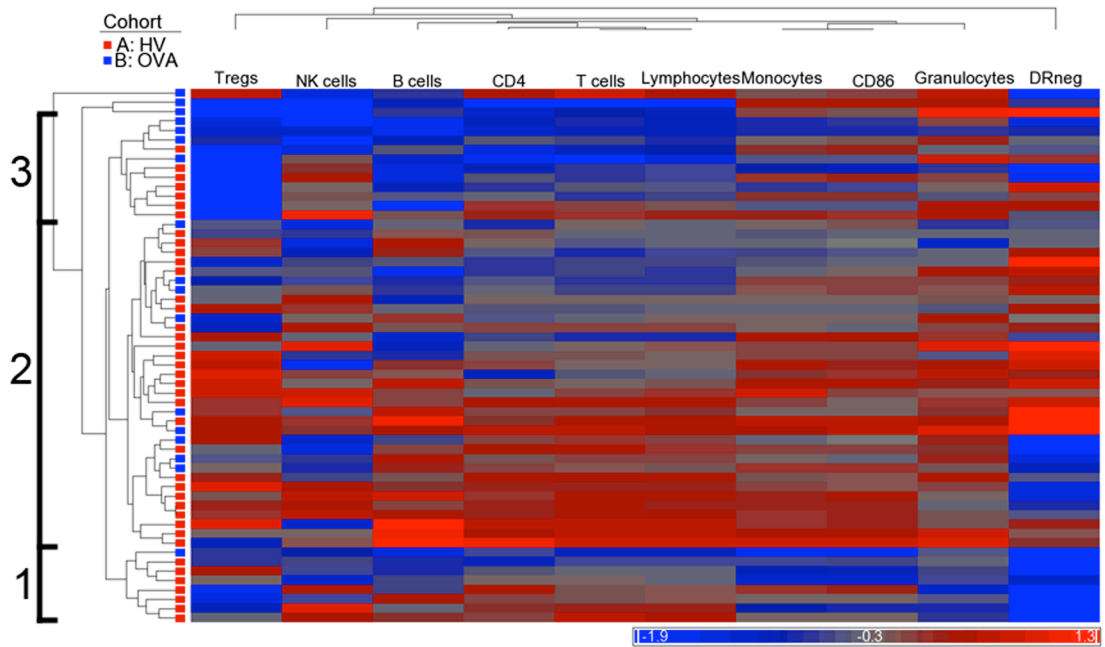

Supplement: media-4 [file media-4.pdf]
