# Supplementary material
Source: HighWire-hosted journal article supplement (https://jitc.bmj.com/content/1/1/7)

Gustafson, et al. Supplemental Figure 1

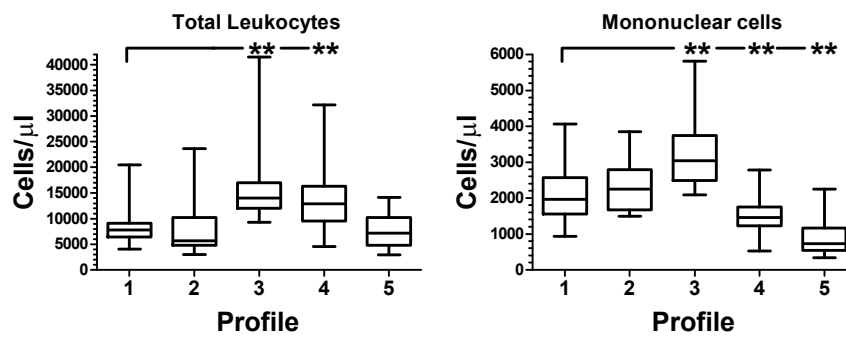

Supplement: media-8 [file media-8.pdf]
