# Supplementary material
Source: HighWire-hosted journal article supplement (https://jitc.bmj.com/content/1/1/7)

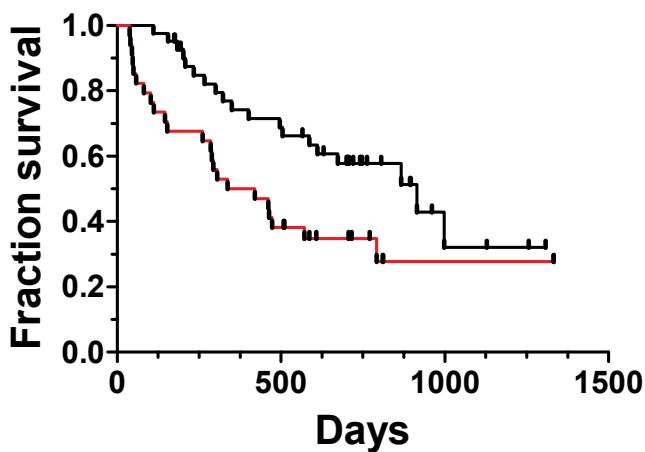

—+ Profile 1 & 2  
—+ Profile 3, 4, & 5

$p=0.009$

Hazard ratio= 0.4595

| Profiles             | 1 & 2 | 3, 4, & 5 |
|----------------------|-------|-----------|
| # of censored events | 23    | 11        |
| # of deaths          | 19    | 23        |
| Median survival      | 915   | 379       |

Supplement: media-13 [file media-13.pdf]
